# Supplementary material
Source: publisher figshare collection journal article supplement (https://frontiersin.figshare.com/ndownloader/files/33527189)
Supplement: Supplementary file 1 [file 33527189]

**Supplementary material. Bird species incidence and total abundance in thirty-one green spaces of Mexico City. Birds were surveyed during winter W), dry breeding (DB), and wet breeding (WB) seasons.**

|  |  |  |  | Incidence | | | Abundance | | |
| --- | --- | --- | --- | --- | --- | --- | --- | --- | --- |
| Order | Family | Species | Common Name | W | DB | WB | W | DB | WB |
| Columbiformes | Columbidae | *Columba livia* | Rock Pigeon | 11 | 12 | 10 | 95 | 68 | 45 |
|  |  | *Columbina inca* | Inca Dove | 21 | 23 | 23 | 151 | 111 | 109 |
| Apodiformes | Trochilidae | *Eugenes fulgens* | Rivoli's Hummingbird | 1 | 0 | 0 | 1 | 0 | 0 |
|  |  | *Lampornis clemenciae* | Blue-throated Mountain-gem | 1 | 0 | 0 | 2 | 0 | 0 |
|  |  | *Cynanthus latirostris* | Broad-billed Hummingbird | 3 | 3 | 1 | 3 | 3 | 1 |
|  |  | *Basilinna leucotis* | White-eared Hummingbird | 5 | 6 | 2 | 15 | 11 | 3 |
|  |  | *Saucerottia beryllina* | Berylline Hummingbird | 7 | 15 | 12 | 13 | 52 | 24 |
| Accipitriformes | Accipitridae | *Accipiter cooperii* | Cooper's Hawk | 0 | 0 | 1 | 0 | 0 | 1 |
|  |  | *Parabuteo unicinctus* | Harris's Hawk | 1 | 1 | 0 | 1 | 2 | 0 |
| Piciformes | Picidae | *Melanerpes formicivorus* | Acorn Woodpecker | 1 | 1 | 1 | 5 | 4 | 2 |
|  |  | *Sphyrapicus varius* | Yellow-bellied Sapsucker | 1 | 0 | 0 | 1 | 0 | 0 |
|  |  | *Dryobates scalaris* | Ladder-backed Woodpecker | 4 | 2 | 1 | 5 | 3 | 2 |
| Falconiformes | Falconidae | *Falco sparverius* | American Kestrel | 1 | 0 | 0 | 1 | 0 | 0 |
| Psittaciformes | Psittacidae | *Myiopsitta monachus* | Monk Parakeet | 1 | 0 | 0 | 1 | 0 | 0 |
| Passeriformes | Tyrannidae | *Tyrannus vociferans* | Cassin's Kingbird | 0 | 1 | 0 | 0 | 1 | 0 |
|  |  | *Mitrephanes phaeocercus* | Tufted Flycatcher | 4 | 2 | 2 | 7 | 4 | 4 |
|  |  | *Contopus pertinax* | Greater Pewee | 2 | 0 | 2 | 5 | 0 | 2 |
|  |  | *Empidonax minimus* | Least Flycatcher | 2 | 1 | 0 | 3 | 1 | 0 |
|  |  | *Empidonax hammondii* | Hammond's Flycatcher | 8 | 0 | 0 | 13 | 0 | 0 |
|  |  | *Pyrocephalus rubinus* | Vermilion Flycatcher | 1 | 3 | 2 | 2 | 8 | 4 |
|  | Vireonidae | *Vireo plumbeus* | Plumbeous Vireo | 2 | 0 | 0 | 2 | 0 | 0 |
|  | Corvidae | *Cyanocorax yncas* | Green Jay | 0 | 2 | 1 | 0 | 3 | 2 |
|  |  | *Cyanocitta stelleri* | Steller's Jay | 2 | 1 | 1 | 6 | 2 | 3 |
|  |  | *Aphelocoma ultramarina* | Transvolcanic Jay | 0 | 0 | 1 | 0 | 0 | 3 |
|  | Paridae | *Poecile sclateri* | Mexican Chickadee | 3 | 3 | 4 | 7 | 8 | 7 |
|  | Aegithalidae | *Psaltriparus minimus* | Bushtit | 8 | 16 | 13 | 33 | 86 | 118 |
|  | Regulidae | *Corthylio calendula* | Ruby-crowned Kinglet | 26 | 0 | 3 | 87 | 0 | 4 |
|  |  | *Regulus satrapa* | Golden-crowned Kinglet | 2 | 0 | 2 | 6 | 0 | 9 |
|  | Ptiliogonatidae | *Ptiliogonys cinereus* | Gray Silky-flycatcher | 4 | 9 | 4 | 23 | 16 | 10 |
|  | Sittidae | *Sitta carolinensis* | White-breasted Nuthatch | 2 | 1 | 3 | 4 | 1 | 5 |
|  | Certhiidae | *Certhia americana* | Brown Creeper | 2 | 2 | 2 | 4 | 3 | 3 |
|  | Polioptilidae | *Polioptila caerulea* | Blue-gray Gnatcatcher | 13 | 0 | 1 | 24 | 0 | 2 |
|  | Troglodytidae | *Catherpes mexicanus* | Canyon Wren | 0 | 2 | 1 | 0 | 5 | 1 |
|  |  | *Troglodytes aedon* | House Wren | 1 | 1 | 0 | 2 | 1 | 0 |
|  |  | *Thryomanes bewickii* | Bewick's Wren | 26 | 23 | 19 | 40 | 81 | 58 |
|  | Mimidae | *Melanotis caerulescens* | Blue Mockingbird | 0 | 1 | 0 | 0 | 2 | 0 |
|  |  | *Toxostoma curvirostre* | Curve-billed Thrasher | 2 | 5 | 3 | 3 | 12 | 6 |
|  | Cinclidae | *Cinclus mexicanus* | American Dipper | 0 | 1 | 0 | 0 | 2 | 0 |
|  | Turdidae | *Myadestes occidentalis* | Brown-backed Solitaire | 3 | 3 | 3 | 11 | 16 | 5 |
|  |  | *Catharus aurantiirostris* | Orange-billed Nightingale-Thrush | 0 | 2 | 0 | 0 | 2 | 0 |
|  |  | *Catharus occidentalis* | Russet Nightingale-Thrush | 2 | 0 | 0 | 4 | 0 | 0 |
|  |  | *Catharus guttatus* | Hermit Thrush | 1 | 0 | 0 | 1 | 0 | 0 |
|  |  | *Turdus assimilis* | White-throated Thrush | 3 | 3 | 1 | 10 | 9 | 2 |
|  |  | *Turdus rufopalliatus* | Rufous-backed Robin | 10 | 29 | 16 | 17 | 136 | 36 |
|  |  | *Turdus migratorius* | American Robin | 9 | 19 | 8 | 35 | 83 | 18 |
|  | Peucedramidae | *Peucedramus taeniatus* | Olive Warbler | 3 | 1 | 3 | 3 | 1 | 3 |
|  | Passeridae | *Passer domesticus* | House Sparrow | 20 | 25 | 18 | 126 | 245 | 123 |
|  | Fringillidae | *Euphonia elegantissima* | Elegant Euphonia | 0 | 1 | 1 | 0 | 1 | 7 |
|  |  | *Coccothraustes abeillei* | Hooded Grosbeak | 0 | 1 | 0 | 0 | 3 | 0 |
|  |  | *Haemorhous mexicanus* | House Finch | 24 | 25 | 22 | 155 | 116 | 80 |
|  |  | *Spinus pinus* | Pine Siskin | 0 | 2 | 0 | 0 | 3 | 0 |
|  |  | *Spinus psaltria* | Lesser Goldfinch | 3 | 2 | 8 | 8 | 4 | 23 |
|  | Passerellidae | *Spizella passerina* | Chipping Sparrow | 0 | 1 | 0 | 0 | 1 | 0 |
|  |  | *Arremon virenticeps* | Green-striped Brushfinch | 2 | 1 | 1 | 4 | 1 | 1 |
|  |  | *Junco phaeonotus* | Yellow-eyed Junco | 3 | 3 | 3 | 27 | 43 | 47 |
|  |  | *Oriturus superciliosus* | Striped Sparrow | 1 | 1 | 0 | 2 | 6 | 0 |
|  |  | *Melospiza melodia* | Song Sparrow | 2 | 5 | 6 | 2 | 20 | 9 |
|  |  | *Melospiza lincolnii* | Lincoln's Sparrow | 1 | 0 | 0 | 6 | 0 | 0 |
|  |  | *Melozone fusca* | Canyon Towhee | 10 | 16 | 11 | 19 | 38 | 30 |
|  |  | *Aimophila ruficeps* | Rufous-crowned Sparrow | 0 | 0 | 1 | 0 | 0 | 1 |
|  |  | *Pipilo maculatus* | Spotted Towhee | 0 | 1 | 0 | 0 | 2 | 0 |
|  |  | *Atlapetes pileatus* | Rufous-capped Brushfinch | 0 | 3 | 2 | 0 | 10 | 7 |
|  | Icteridae | *Icterus wagleri* | Black-vented Oriole | 0 | 1 | 0 | 0 | 2 | 0 |
|  |  | *Icterus spurius* | Orchard Oriole | 0 | 1 | 1 | 0 | 5 | 6 |
|  |  | *Icterus bullockii* | Bullock's Oriole | 4 | 1 | 0 | 5 | 3 | 0 |
|  |  | *Icterus parisorum* | Scott's Oriole | 2 | 0 | 0 | 2 | 0 | 0 |
|  |  | *Molothrus aeneus* | Bronzed Cowbird | 0 | 11 | 1 | 0 | 41 | 2 |
|  |  | *Quiscalus mexicanus* | Great-tailed Grackle | 16 | 15 | 14 | 107 | 70 | 127 |
|  | Parulidae | *Seiurus aurocapilla* | Ovenbird | 1 | 0 | 0 | 1 | 0 | 0 |
|  |  | *Mniotilta varia* | Black-and-white Warbler | 5 | 1 | 4 | 5 | 1 | 4 |
|  |  | *Oreothlypis superciliosa* | Crescent-chested Warbler | 1 | 3 | 4 | 4 | 17 | 8 |
|  |  | *Leiothlypis celata* | Orange-crowned Warbler | 2 | 0 | 0 | 3 | 0 | 0 |
|  |  | *Leiothlypis ruficapilla* | Nashville Warbler | 12 | 0 | 0 | 20 | 0 | 0 |
|  |  | *Setophaga petechia* | Yellow Warbler | 1 | 0 | 0 | 1 | 0 | 0 |
|  |  | *Setophaga coronata* | Yellow-rumped Warbler | 28 | 1 | 0 | 140 | 1 | 0 |
|  |  | *Setophaga nigrescens* | Black-throated Gray Warbler | 1 | 0 | 2 | 1 | 0 | 2 |
|  |  | *Setophaga townsendi* | Townsend's Warbler | 4 | 0 | 1 | 9 | 0 | 5 |
|  |  | *Setophaga occidentalis* | Hermit Warbler | 0 | 0 | 2 | 0 | 0 | 3 |
|  |  | *Setophaga virens* | Black-throated Green Warbler | 2 | 0 | 4 | 4 | 0 | 6 |
|  |  | *Basileuterus rufifrons* | Rufous-capped Warbler | 2 | 1 | 1 | 5 | 2 | 3 |
|  |  | *Basileuterus belli* | Golden-browed Warbler | 2 | 1 | 0 | 4 | 3 | 0 |
|  |  | *Cardellina pusilla* | Wilson's Warbler | 17 | 1 | 1 | 35 | 1 | 3 |
|  |  | *Cardellina rubra* | Red Warbler | 3 | 2 | 3 | 12 | 6 | 6 |
|  |  | *Myioborus pictus* | Painted Redstart | 3 | 2 | 4 | 6 | 2 | 5 |
|  |  | *Myioborus miniatus* | Slate-throated Redstart | 3 | 0 | 0 | 8 | 0 | 0 |
|  | Cardinalidae | *Piranga flava* | Hepatic Tanager | 0 | 1 | 1 | 0 | 1 | 2 |
|  |  | *Piranga rubra* | Summer Tanager | 6 | 0 | 0 | 9 | 0 | 0 |
|  |  | *Piranga ludoviciana* | Western Tanager | 2 | 1 | 0 | 2 | 1 | 0 |
|  |  | *Piranga bidentata* | Flame-colored Tanager | 1 | 1 | 0 | 1 | 2 | 0 |
|  |  | *Pheucticus melanocephalus* | Black-headed Grosbeak | 4 | 8 | 3 | 9 | 24 | 5 |
|  | Thraupidae | *Diglossa baritula* | Cinnamon-bellied Flowerpiercer | 1 | 2 | 0 | 5 | 3 | 0 |
